# Supplementary material for: Tuning metal to metal charge transfer properties in cyanidometal-bridged complexes by changing the auxiliary ligand on the bridge
Source: Royal Society of Chemistry journal article supplement (doi:10.1039/d1dt00157d), 2021-01-01
Supplement: d1dt00157d1.pdf [file d1dt00157d1.pdf]

*Supplementary Information for*

## **Tuning metal to metal charge transfer properties in cyanidometal-bridged complexes by changing the auxiliary ligand on the bridge**

Qing-Dou Xu,<sup>a,b</sup> Chen Zeng,<sup>a,b</sup> Shao-Dong Su,<sup>a</sup> Yu-Ying Yang,<sup>a</sup> Sheng-Min Hu,<sup>a</sup> Ting-Ya Li,<sup>a,b</sup> Xin-Tao Wu<sup>a</sup> and Tian-Lu Sheng\*<sup>a</sup>

<sup>a</sup> State Key Laboratory of Structural Chemistry, Fujian Institute of Research on the Structure of Matter, Chinese Academy of Sciences. Fuzhou, Fujian 350002, P.R. China

<sup>b</sup> School of Chemical Sciences, University of Chinese Academy of Sciences. Beijing, 100049, P.R. China

## Table of Contents

### 1. Single crystal structure

**Fig. S1:** Single crystal structure of **2**(PF<sub>6</sub>)<sub>2</sub>.

**Fig. S2:** Single crystal structure of **2**(PF<sub>6</sub>)<sub>3</sub>.

**Fig. S3:** Single crystal structure of **2**(PF<sub>6</sub>)<sub>4</sub>.

### 2. Crystallographic data

**Table S1:** Crystallographic data for **1**(PF<sub>6</sub>)<sub>n</sub> (n = 2, 3, 4)

**Table S2:** Crystallographic data for **2**(PF<sub>6</sub>)<sub>n</sub> (n = 2, 3, 4)

**Table S3:** Selected bond lengths (Å) of **1**(PF<sub>6</sub>)<sub>3</sub>

### 3. IR spectra

**Figure S4:** IR spectra of **1**(PF<sub>6</sub>)<sub>2</sub> and **2**(PF<sub>6</sub>)<sub>2</sub> by the grinding and pressing tablet process.

### 4. UV-vis-NIR spectroscopy

**Figure S5:** The UV-vis-NIR spectroscopy of **2**(PF<sub>6</sub>)<sub>n</sub> (n = 2, 3, 4) in CH<sub>3</sub>CN and the Gaussian peak fitting of **2**(PF<sub>6</sub>)<sub>3</sub>.

**Figure S6:** The UV-vis-NIR spectroscopy of **2**(PF<sub>6</sub>)<sub>n</sub> (n = 3, 4) in different solvents.

**Table S4:** The maximum absorption (ν<sub>max</sub>/cm<sup>-1</sup>( λ<sub>max</sub>/nm)) of the broad MMCT absorption peak for **1**(PF<sub>6</sub>)<sub>n</sub> and **2**(PF<sub>6</sub>)<sub>n</sub> (n = 3 (before the Gaussian peak fitting), 4) in different solvents

### 5. TDDFT calculations

**Fig. S7:** Molecular orbital diagrams of **2**(PF<sub>6</sub>)<sub>3</sub> in dichloromethane.

**Fig. S8:** The spin density distribution of **2**(PF<sub>6</sub>)<sub>3</sub>.

**Fig. S9:** Molecular orbital diagrams of **2**(PF<sub>6</sub>)<sub>4</sub> in dichloromethane.

**Fig. S10:** The spin density distribution of **2**(PF<sub>6</sub>)<sub>4</sub>.

**Table S5:** Calculated and experimental electronic transition absorption peak of **1**(PF<sub>6</sub>)<sub>n</sub> and **2**(PF<sub>6</sub>)<sub>n</sub> (n = 3, 4)

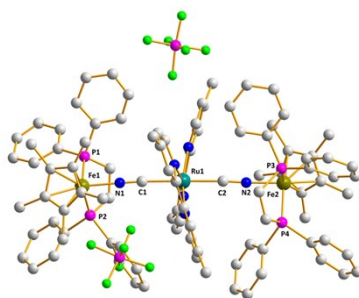

**Fig. S1** Single crystal structure of  $2(\text{PF}_6)_2$  (hydrogen atoms and solvent molecules have been removed for clarity). Ru, teal; Fe, dark yellow; C, gray; N, blue; P, pink.

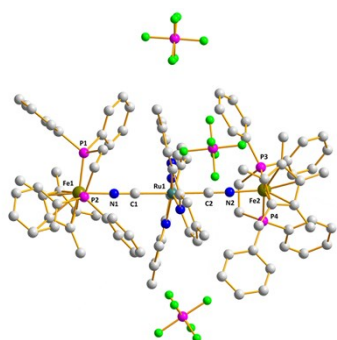

**Fig. S2** Single crystal structure of  $2(\text{PF}_6)_3$  (hydrogen atoms and solvent molecules have been removed for clarity). Ru, teal; Fe, dark yellow; C, gray; N, blue; P, pink.

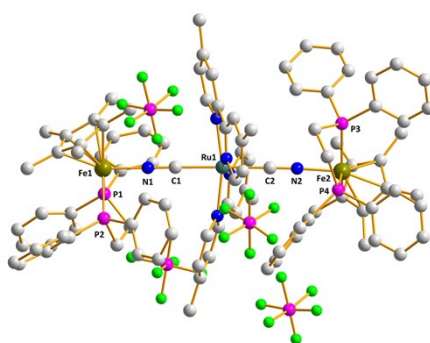

**Fig. S3** Single crystal structure of  $2(\text{PF}_6)_4$  (hydrogen atoms and solvent molecules have been removed for clarity). Ru, teal; Fe, dark yellow; C, gray; N, blue; P, pink.

**Table S1** Crystallographic data for  $1(\text{PF}_6)_n$  ( $n = 2, 3, 4$ )

|                   | $1(\text{PF}_6)_2$                                                                           | $1(\text{PF}_6)_3$                                                                                         | $1(\text{PF}_6)_4$                                                                |
|-------------------|----------------------------------------------------------------------------------------------|------------------------------------------------------------------------------------------------------------|-----------------------------------------------------------------------------------|
| Empirical formula | $\text{C}_{96}\text{H}_{98}\text{Cl}_4\text{F}_{12}\text{Fe}_2\text{N}_6\text{P}_6\text{Ru}$ | $\text{C}_{188}\text{H}_{188}\text{F}_{42}\text{Fe}_4\text{N}_{12}\text{O}_{1.25}\text{P}_{15}\text{Ru}_2$ | $\text{C}_{96}\text{H}_{97}\text{F}_{24}\text{Fe}_2\text{N}_7\text{P}_8\text{Ru}$ |
| Formula weight    | 2104.19                                                                                      | 4323.58                                                                                                    | 2265.33                                                                           |
| Crystal size (mm) | $0.420 \times 0.305 \times 0.280$                                                            | $0.252 \times 0.210 \times 0.125$                                                                          | $0.408 \times 0.310 \times 0.306$                                                 |
| Temperature/K     | 293(2)                                                                                       | 293(2)                                                                                                     | 293(2)                                                                            |
| Crystal system    | triclinic                                                                                    | triclinic                                                                                                  | monoclinic                                                                        |

|                                            |                                                                  |                                                                  |                                                                  |
|--------------------------------------------|------------------------------------------------------------------|------------------------------------------------------------------|------------------------------------------------------------------|
| Space group                                | P $\bar{1}$                                                      | P $\bar{1}$                                                      | P2 $_1$ /n                                                       |
| a/Å                                        | 11.9194(5)                                                       | 23.186(2)                                                        | 17.219(4)                                                        |
| b/Å                                        | 14.9993(5)                                                       | 24.5526(19)                                                      | 14.916(3)                                                        |
| c/Å                                        | 16.5490(5)                                                       | 25.215(2)                                                        | 20.604(5)                                                        |
| $\alpha$ /°                                | 106.505(3)                                                       | 113.495(8)                                                       | 90                                                               |
| $\beta$ /°                                 | 105.512(3)                                                       | 113.588(9)                                                       | 112.212(4)                                                       |
| $\gamma$ /°                                | 95.595(3)                                                        | 90.261(7)                                                        | 90                                                               |
| Volume/Å <sup>3</sup>                      | 2684.80(18)                                                      | 11832(2)                                                         | 4899(2)                                                          |
| Z                                          | 1                                                                | 2                                                                | 2                                                                |
| $\rho_{\text{calcd}}$ /g cm <sup>-3</sup>  | 1.301                                                            | 1.214                                                            | 1.536                                                            |
| $\mu$ /mm <sup>-1</sup>                    | 0.659                                                            | 3.015                                                            | 0.671                                                            |
| F(000)                                     | 1078.0                                                           | 4410.0                                                           | 2308.0                                                           |
| $\lambda$ (Mo/Ga K $\alpha$ , Å)           | Mo, 0.71073                                                      | Ga, 1.3405                                                       | Mo, 0.71073                                                      |
| 2 $\theta$ range/°                         | 4.542-54.966                                                     | 4.548-104.096                                                    | 5.466-55.016                                                     |
|                                            | -15 $\leq$ h $\leq$ 15                                           | -27 $\leq$ h $\leq$ 27                                           | -22 $\leq$ h $\leq$ 22                                           |
| Index range                                | -19 $\leq$ k $\leq$ 19                                           | -28 $\leq$ k $\leq$ 28                                           | -19 $\leq$ k $\leq$ 19                                           |
|                                            | -21 $\leq$ l $\leq$ 21                                           | -29 $\leq$ l $\leq$ 29                                           | -26 $\leq$ l $\leq$ 26                                           |
| Reflections collected                      | 43294                                                            | 315602                                                           | 72923                                                            |
| Independent reflections                    | 12216 (R $_{\text{int}}$ = 0.0493, R $_{\text{sigma}}$ = 0.0440) | 39934 (R $_{\text{int}}$ = 0.3644, R $_{\text{sigma}}$ = 0.1920) | 11175 (R $_{\text{int}}$ = 0.0631, R $_{\text{sigma}}$ = 0.0476) |
| Data/restraints/parameters                 | 12216/0/579                                                      | 39934/4953/2322                                                  | 11175/51/673                                                     |
| Goodness-of-fit on F <sup>2</sup>          | 1.048                                                            | 1.018                                                            | 1.029                                                            |
| R $_1$ , wR $_2$ (I $\geq$ 2 $\sigma$ (I)) | R $_1$ = 0.0747, wR $_2$ = 0.1959                                | R $_1$ = 0.2318, wR $_2$ = 0.5523                                | R $_1$ = 0.0624, wR $_2$ = 0.1573                                |
| R $_1$ , wR $_2$ (all data)                | R $_1$ = 0.1001, wR $_2$ = 0.2121                                | R $_1$ = 0.3088, wR $_2$ = 0.6001                                | R $_1$ = 0.0689, wR $_2$ = 0.1632                                |

**Table S2** Crystallographic data for **2**(PF<sub>6</sub>)<sub>n</sub> (n = 2, 3, 4)

|                   | <b>2</b> (PF <sub>6</sub> ) <sub>2</sub>                                                          | <b>2</b> (PF <sub>6</sub> ) <sub>3</sub>                                                                                                          | <b>2</b> (PF <sub>6</sub> ) <sub>4</sub>                                                                                                         |
|-------------------|---------------------------------------------------------------------------------------------------|---------------------------------------------------------------------------------------------------------------------------------------------------|--------------------------------------------------------------------------------------------------------------------------------------------------|
| Empirical formula | C <sub>98</sub> H <sub>102</sub> F <sub>12</sub> Fe <sub>2</sub> N <sub>6</sub> P <sub>6</sub> Ru | C <sub>398</sub> H <sub>420</sub> Cl <sub>12</sub> F <sub>72</sub> Fe <sub>8</sub> N <sub>24</sub> O <sub>3</sub> P <sub>28</sub> Ru <sub>4</sub> | C <sub>198</sub> H <sub>208</sub> Cl <sub>4</sub> F <sub>48</sub> Fe <sub>4</sub> N <sub>12</sub> O <sub>5</sub> P <sub>16</sub> Ru <sub>2</sub> |
| Formula weight    | 1990.44                                                                                           | 9099.20                                                                                                                                           | 4810.61                                                                                                                                          |
| Crystal size (mm) | 0.412 × 0.360 × 0.341                                                                             | 0.286 × 0.110 × 0.102                                                                                                                             | 0.408 × 0.360 × 0.355                                                                                                                            |
| Temperature/K     | 293(2)                                                                                            | 110.6(3)                                                                                                                                          | 293(2)                                                                                                                                           |
| Crystal system    | orthorhombic                                                                                      | triclinic                                                                                                                                         | monoclinic                                                                                                                                       |
| Space group       | Pca2 <sub>1</sub>                                                                                 | P $\bar{1}$                                                                                                                                       | P2 $_1$ /n                                                                                                                                       |
| a/Å               | 21.111(5)                                                                                         | 15.54011(5)                                                                                                                                       | 13.159(3)                                                                                                                                        |
| b/Å               | 15.961(3)                                                                                         | 20.78264(9)                                                                                                                                       | 28.160(6)                                                                                                                                        |
| c/Å               | 34.384(8)                                                                                         | 33.67197(16)                                                                                                                                      | 36.422(7)                                                                                                                                        |
| $\alpha$ /°       | 90                                                                                                | 107.8851(4)                                                                                                                                       | 90                                                                                                                                               |
| $\beta$ /°        | 90                                                                                                | 95.1931(3)                                                                                                                                        | 97.758(5)                                                                                                                                        |

|                                             |                                                                   |                                                                   |                                                                   |
|---------------------------------------------|-------------------------------------------------------------------|-------------------------------------------------------------------|-------------------------------------------------------------------|
| $\gamma/^\circ$                             | 90                                                                | 90.3443(3)                                                        | 90                                                                |
| Volume/ $\text{\AA}^3$                      | 11586(4)                                                          | 10300.28(8)                                                       | 13373(5)                                                          |
| Z                                           | 4                                                                 | 1                                                                 | 2                                                                 |
| $\rho_{\text{calcd}}/\text{g cm}^{-3}$      | 1.141                                                             | 1.467                                                             | 1.195                                                             |
| $\mu/\text{mm}^{-1}$                        | 0.518                                                             | 3.866                                                             | 0.535                                                             |
| F(000)                                      | 4104.0                                                            | 4656.0                                                            | 4904.0                                                            |
| $\lambda$ (Mo/Ga $K\alpha$ , $\text{\AA}$ ) | Mo, 0.71073                                                       | Ga, 1.3405                                                        | Mo, 0.71073                                                       |
| $2\theta$ range/ $^\circ$                   | 2.368-54.97                                                       | 4.818-104.096                                                     | 4.258-55.018                                                      |
|                                             | $-27 \leq h \leq 27$                                              | $-18 \leq h \leq 18$                                              | $-17 \leq h \leq 16$                                              |
| Index range                                 | $-20 \leq k \leq 20$                                              | $-24 \leq k \leq 24$                                              | $-36 \leq k \leq 36$                                              |
|                                             | $-44 \leq l \leq 44$                                              | $-39 \leq l \leq 39$                                              | $-47 \leq l \leq 47$                                              |
| Reflections collected                       | 164564                                                            | 248527                                                            | 186641                                                            |
| Independent reflections                     | 26501 ( $R_{\text{int}} = 0.0899$ , $R_{\text{sigma}} = 0.0467$ ) | 34905 ( $R_{\text{int}} = 0.0827$ , $R_{\text{sigma}} = 0.0324$ ) | 30205 ( $R_{\text{int}} = 0.0650$ , $R_{\text{sigma}} = 0.0503$ ) |
| Data/restraints/parameters                  | 26501/116/1081                                                    | 34905/30/2531                                                     | 30205/64/1365                                                     |
| Goodness-of-fit on $F^2$                    | 1.054                                                             | 1.047                                                             | 0.999                                                             |
| $R_1, wR_2$ ( $I \geq 2\sigma(I)$ )         | $R_1 = 0.0832$ , $wR_2 = 0.2227$                                  | $R_1 = 0.0601$ , $wR_2 = 0.1611$                                  | $R_1 = 0.0904$ , $wR_2 = 0.2450$                                  |
| $R_1, wR_2$ (all data)                      | $R_1 = 0.0906$ , $wR_2 = 0.2310$                                  | $R_1 = 0.0630$ , $wR_2 = 0.1634$                                  | $R_1 = 0.1074$ , $wR_2 = 0.2670$                                  |

**Table S3** Selected bond lengths ( $\text{\AA}$ ) of **1**(PF<sub>6</sub>)<sub>3</sub>

|        | <b>1</b> <sup>3+</sup> | <b>1</b> <sup>3+</sup> <sub>av</sub> |
|--------|------------------------|--------------------------------------|
| Ru1-C1 | 1.967(9)               | -                                    |
| Ru1-C2 | 1.999(10)              | -                                    |
| C1=N1  | 1.396(9)               | -                                    |
| C2=N2  | 1.249(13)              | -                                    |
| Fe1-N1 | 1.938(8)               | -                                    |
| Fe2-N2 | 1.913(8)               | -                                    |
| Fe1-P1 | 2.302(6)               |                                      |
| Fe1-P2 | 2.322(6)               | 2.313                                |
| Fe2-P3 | 2.252(7)               |                                      |
| Fe2-P4 | 2.237(6)               | 2.245                                |

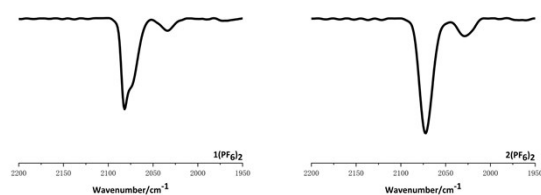

Fig. S4 IR spectra of  $1(\text{PF}_6)_2$  and  $2(\text{PF}_6)_2$  by the grinding and pressing tablet process.

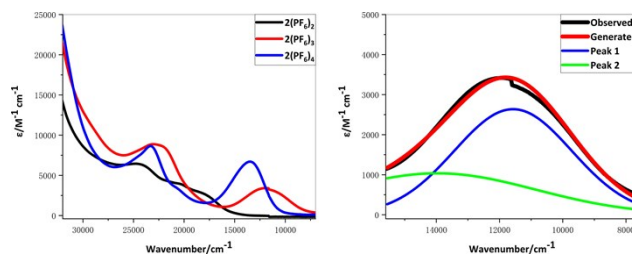

Fig. S5 The UV-vis-NIR spectroscopy of  $2(\text{PF}_6)_n$  ( $n = 2, 3, 4$ ; left) in  $\text{CH}_3\text{CN}$  and the Gaussian peak fitting of  $2(\text{PF}_6)_3$  (right).

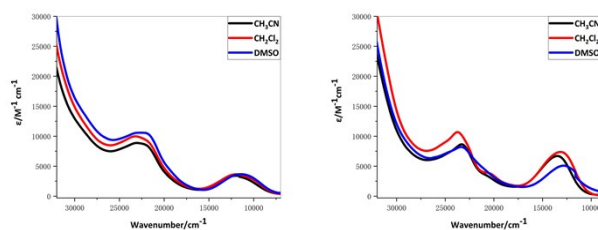

Fig. S6 The UV-vis-NIR spectroscopy of  $2(\text{PF}_6)_n$  ( $n = 3$  (left),  $4$  (right)) in different solvents.

**Table S4** The maximum absorption ( $\nu_{\text{max}}/\text{cm}^{-1}(\lambda_{\text{max}}/\text{nm})$ ) of the broad MMCT absorption peak for  $1(\text{PF}_6)_n$  and  $2(\text{PF}_6)_n$  ( $n = 3$  (before the Gaussian peak fitting),  $4$ ) in different solvents

|                          | $1(\text{PF}_6)_3$ | $1(\text{PF}_6)_4$ | $2(\text{PF}_6)_3$ | $2(\text{PF}_6)_4$ |
|--------------------------|--------------------|--------------------|--------------------|--------------------|
| $\text{CH}_3\text{CN}$   | 13707(730)         | 14085(710)         | 11933(838)         | 13477(742)         |
| $\text{CH}_2\text{Cl}_2$ | 13812(724)         | 13966(716)         | 11990(834)         | 13158(760)         |
| DMSO                     | 13369(748)         | 13123(762)         | 11468(872)         | 12853(778)         |



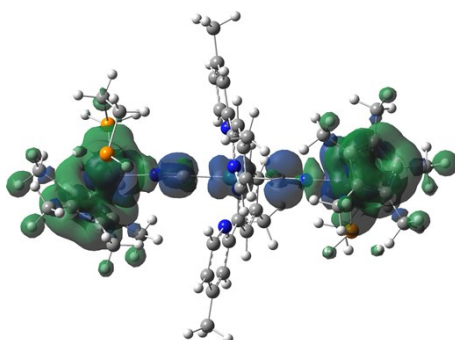

**Fig. S10** The spin density distribution of  $2(\text{PF}_6)_4$  (Ru, 0.108; Fe, 1.543 and 1.553; contour value: 0.0004 e/bohr<sup>3</sup>).

**Table S5** Calculated and experimental electronic transition absorption peak of  $1(\text{PF}_6)_n$  and  $2(\text{PF}_6)_n$  ( $n = 3, 4$ )

| Complex            | Electronic transition             | f      | $\nu_{\text{max}}$ (exp)/cm <sup>-1</sup> | $\nu_{\text{max}}$ (calc)/cm <sup>-1</sup> |
|--------------------|-----------------------------------|--------|-------------------------------------------|--------------------------------------------|
| $1(\text{PF}_6)_3$ | HOMO (242B) → SOMO (243B) (52%)   | 0.0428 | 13337                                     | 13625                                      |
|                    | HOMO-4 (238B) → SOMO (243B) (28%) | 0.0514 | 16301                                     | 18879                                      |
|                    | HOMO-3 (239B) → SOMO (243B) (35%) |        |                                           |                                            |
| $1(\text{PF}_6)_4$ | HOMO-1 (220B) → SOMO (222B) (66%) | 0.1781 | 14085                                     | 17884                                      |
|                    | HOMO (221B) → SOMO (222B) (20%)   |        |                                           |                                            |
| $2(\text{PF}_6)_3$ | HOMO (258B) → SOMO (259B) (80%)   | 0.0697 | 11573                                     | 11457                                      |
|                    | HOMO-3 (255B) → SOMO (259B) (9%)  | 0.0433 | 13976                                     | 14755                                      |
|                    | HOMO-2 (256B) → SOMO (259B) (22%) |        |                                           |                                            |
|                    | HOMO-1 (257B) → SOMO (259B) (54%) |        |                                           |                                            |
| $2(\text{PF}_6)_4$ | HOMO-1 (256B) → SOMO (258B) (39%) | 0.1299 | 13477                                     | 17707                                      |
|                    | SOMO+1 (259A) → LUMO (260A) (14%) |        |                                           |                                            |

**Optimized Cartesian Coordinates of  $1^{3+}$**

| Atomic Name | X         | Y         | Z         |
|-------------|-----------|-----------|-----------|
| Ru          | 0.040958  | 0.061893  | 0.038158  |
| Fe          | -5.072719 | 0.007555  | -0.069808 |
| P           | -5.201645 | 1.544789  | 1.582916  |
| P           | -5.439226 | 1.734245  | -1.483452 |
| N           | -3.19711  | 0.263442  | -0.112469 |
| N           | -0.113434 | -1.70037  | -1.101369 |
| N           | -0.272502 | -1.431648 | 1.4837    |
| C           | -2.008282 | 0.269351  | -0.077956 |
| C           | 0.059231  | -2.864149 | -0.396675 |
| C           | -0.039222 | -2.71388  | 1.061007  |
| C           | -4.996529 | -1.942083 | 0.681224  |
| C           | -0.690942 | -1.229583 | 2.755362  |
| H           | -0.990265 | -0.21973  | 3.012044  |
| C           | -8.296043 | -0.370931 | -0.318571 |
| H           | -8.499116 | 0.316185  | 0.512897  |
| H           | -9.082963 | -1.135178 | -0.309978 |
| H           | -8.410314 | 0.199549  | -1.248469 |



|    |           |           |           |
|----|-----------|-----------|-----------|
| C  | -0.354923 | -1.773967 | -2.431062 |
| H  | -0.620502 | -0.846543 | -2.924573 |
| C  | -6.933785 | -0.98288  | -0.208318 |
| C  | -4.892765 | -1.972854 | -0.764812 |
| C  | -6.27838  | -1.376432 | 1.014061  |
| C  | -0.084118 | -3.791193 | 1.955558  |
| H  | 0.113461  | -4.800216 | 1.610949  |
| C  | -6.08386  | -1.396992 | -1.311947 |
| C  | -3.75563  | -2.535286 | -1.552252 |
| H  | -3.608778 | -1.982667 | -2.489369 |
| H  | -3.938389 | -3.58667  | -1.810655 |
| H  | -2.816199 | -2.486594 | -0.983714 |
| C  | -3.982378 | -2.470831 | 1.642058  |
| H  | -2.962644 | -2.26785  | 1.281212  |
| H  | -4.081639 | -3.555421 | 1.781864  |
| H  | -4.0832   | -2.000283 | 2.628506  |
| C  | -0.775368 | -2.265031 | 3.68824   |
| H  | -1.113136 | -2.055933 | 4.696102  |
| C  | 0.13217   | -4.102283 | -1.049383 |
| H  | 0.275993  | -5.013789 | -0.479844 |
| C  | -0.316801 | -2.979676 | -3.13464  |
| H  | -0.52221  | -2.989873 | -4.198293 |
| C  | -0.430395 | -3.56423  | 3.291527  |
| H  | -0.471553 | -4.387103 | 3.995971  |
| C  | -6.419398 | -1.3287   | -2.76796  |
| H  | -7.220641 | -0.613006 | -2.979392 |
| H  | -6.771987 | -2.306751 | -3.11854  |
| H  | -5.549305 | -1.057591 | -3.37873  |
| C  | -0.032845 | -4.162022 | -2.436955 |
| H  | 0.013722  | -5.112959 | -2.955522 |
| C  | -6.855749 | -1.273824 | 2.389684  |
| H  | -6.092202 | -1.056599 | 3.147927  |
| H  | -7.324566 | -2.226006 | 2.666426  |
| H  | -7.634653 | -0.506359 | 2.456678  |
| C  | -5.152796 | 3.286987  | 0.808237  |
| H  | -5.526006 | 4.034987  | 1.513321  |
| H  | -4.098593 | 3.509929  | 0.592906  |
| C  | -5.97728  | 3.26222   | -0.481978 |
| H  | -5.850972 | 4.179447  | -1.063835 |
| H  | -7.045991 | 3.145194  | -0.263272 |
| Fe | 5.117664  | -0.073716 | 0.053266  |
| P  | 5.160276  | -1.456477 | -1.794988 |
| P  | 5.492969  | -2.020888 | 1.247645  |
| N  | 3.239525  | -0.253002 | 0.123206  |

|   |           |           |           |
|---|-----------|-----------|-----------|
| N | 0.128856  | 1.814241  | 1.18832   |
| N | 0.240098  | 1.58346   | -1.403515 |
| C | 2.043206  | -0.165147 | 0.119531  |
| C | -0.151946 | 2.96771   | 0.50242   |
| C | -0.100843 | 2.83486   | -0.958633 |
| C | 5.229745  | 1.968268  | -0.584548 |
| C | 0.574856  | 1.42294   | -2.705489 |
| H | 0.935419  | 0.441457  | -2.99346  |
| C | 8.382919  | 0.077576  | 0.308453  |
| H | 8.501043  | -0.641076 | -0.512686 |
| H | 9.211998  | 0.79177   | 0.231161  |
| H | 8.514216  | -0.462886 | 1.251465  |
| C | 0.374708  | 1.888539  | 2.51806   |
| H | 0.696913  | 0.97222   | 2.999905  |
| C | 7.068602  | 0.785956  | 0.245235  |
| C | 5.096267  | 1.894489  | 0.852201  |
| C | 6.472763  | 1.333181  | -0.949635 |
| C | -0.234469 | 3.908845  | -1.84895  |
| H | -0.531489 | 4.887166  | -1.487678 |
| C | 6.225648  | 1.163089  | 1.37172   |
| C | 3.997731  | 2.480254  | 1.670515  |
| H | 3.763079  | 1.849388  | 2.535687  |
| H | 4.291608  | 3.467067  | 2.049741  |
| H | 3.080328  | 2.604254  | 1.084012  |
| C | 4.263925  | 2.607004  | -1.524824 |
| H | 3.232666  | 2.505357  | -1.163543 |
| H | 4.47749   | 3.677104  | -1.638707 |
| H | 4.314171  | 2.155762  | -2.522845 |
| C | 0.484774  | 2.459557  | -3.636176 |
| H | 0.751443  | 2.28146   | -4.671093 |
| C | -0.310804 | 4.188654  | 1.171717  |
| H | -0.551221 | 5.089359  | 0.617784  |
| C | 0.252243  | 3.078997  | 3.236831  |
| H | 0.452032  | 3.089695  | 4.30165   |
| C | 0.037581  | 3.717362  | -3.206826 |
| H | -0.070152 | 4.535402  | -3.909895 |
| C | 6.522588  | 0.956536  | 2.82086   |
| H | 7.289478  | 0.193441  | 2.986552  |
| H | 6.903731  | 1.886566  | 3.260717  |
| H | 5.627413  | 0.675358  | 3.387953  |
| C | -0.130257 | 4.24477   | 2.556963  |
| H | -0.2549   | 5.180656  | 3.089625  |
| C | 7.080481  | 1.31768   | -2.312291 |
| H | 6.333822  | 1.241425  | -3.111523 |

|   |           |           |           |
|---|-----------|-----------|-----------|
| H | 7.619285  | 2.259894  | -2.475386 |
| H | 7.81345   | 0.513981  | -2.434529 |
| C | 4.80783   | -3.213838 | -1.188948 |
| H | 5.012389  | -3.940955 | -1.979666 |
| H | 3.738909  | -3.259245 | -0.944885 |
| C | 5.676577  | -3.47884  | 0.045943  |
| H | 5.399901  | -4.4146   | 0.538763  |
| H | 6.737363  | -3.548258 | -0.223679 |
| H | 6.575723  | -2.177135 | 2.168936  |
| H | 4.37524   | -2.383528 | 2.064263  |
| H | 4.174206  | -1.204799 | -2.801129 |
| H | 6.347088  | -1.594388 | -2.585975 |
| H | -6.337741 | 1.636194  | 2.457643  |
| H | -4.144068 | 1.628768  | 2.559453  |
| H | -4.298655 | 2.259254  | -2.193232 |
| H | -6.392099 | 1.703686  | -2.555267 |

**Optimized Cartesian Coordinates of 1<sup>4+</sup>**

| Atomic Name | X         | Y         | Z         |
|-------------|-----------|-----------|-----------|
| Ru          | -0.000012 | -0.000143 | 0.000315  |
| Fe          | -5.144491 | 0.048684  | -0.049038 |
| P           | -5.383187 | 1.714577  | 1.551758  |
| P           | -5.61676  | 1.76841   | -1.554292 |
| N           | -3.229496 | 0.29343   | -0.056427 |
| N           | -0.191927 | -1.652765 | -1.297576 |
| N           | -0.238715 | -1.638289 | 1.31115   |
| C           | -2.036371 | 0.239362  | -0.036679 |
| C           | 0.026367  | -2.875836 | -0.717009 |
| C           | -0.002631 | -2.867998 | 0.751843  |
| C           | -5.203437 | -1.900371 | 0.862006  |
| C           | -0.557785 | -1.571518 | 2.626341  |
| H           | -0.844676 | -0.597454 | 3.005547  |
| C           | -8.408197 | -0.292062 | -0.326243 |
| H           | -8.592778 | 0.504281  | 0.405388  |
| H           | -9.200201 | -1.039019 | -0.187598 |
| H           | -8.543414 | 0.12866   | -1.327695 |
| C           | -0.470283 | -1.601249 | -2.622398 |
| H           | -0.747015 | -0.632137 | -3.021052 |
| C           | -7.064045 | -0.917989 | -0.148147 |
| C           | -5.037187 | -2.011193 | -0.570763 |
| C           | -6.473531 | -1.274512 | 1.121297  |
| C           | 0.040082  | -4.026414 | 1.539718  |
| H           | 0.243084  | -4.991462 | 1.0892    |
| C           | -6.187201 | -1.415981 | -1.202399 |

|    |           |           |           |
|----|-----------|-----------|-----------|
| C  | -3.896918 | -2.660856 | -1.277119 |
| H  | -3.76134  | -2.246017 | -2.281944 |
| H  | -4.080838 | -3.737073 | -1.386273 |
| H  | -2.95614  | -2.531661 | -0.726472 |
| C  | -4.245358 | -2.380135 | 1.89774   |
| H  | -3.221859 | -2.416819 | 1.5057    |
| H  | -4.512911 | -3.389546 | 2.235107  |
| H  | -4.247765 | -1.730611 | 2.781749  |
| C  | -0.550991 | -2.6927   | 3.458921  |
| H  | -0.805652 | -2.589154 | 4.506945  |
| C  | 0.098751  | -4.042723 | -1.490161 |
| H  | 0.288785  | -5.00234  | -1.022663 |
| C  | -0.437091 | -2.732037 | -3.441297 |
| H  | -0.661877 | -2.641519 | -4.497359 |
| C  | -0.212751 | -3.939197 | 2.912878  |
| H  | -0.179477 | -4.825901 | 3.535758  |
| C  | -6.486249 | -1.444227 | -2.665037 |
| H  | -7.259951 | -0.724549 | -2.949565 |
| H  | -6.864394 | -2.435413 | -2.94527  |
| H  | -5.59653  | -1.255451 | -3.276405 |
| C  | -0.111881 | -3.97129  | -2.871415 |
| H  | -0.058249 | -4.86491  | -3.482912 |
| C  | -7.110265 | -1.111405 | 2.459917  |
| H  | -6.38027  | -0.934382 | 3.258146  |
| H  | -7.641542 | -2.036632 | 2.719056  |
| H  | -7.857077 | -0.311399 | 2.477918  |
| C  | -5.245974 | 3.391738  | 0.682806  |
| H  | -5.589973 | 4.191117  | 1.344844  |
| H  | -4.183757 | 3.557832  | 0.465168  |
| C  | -6.078055 | 3.339564  | -0.60185  |
| H  | -5.913268 | 4.223501  | -1.223764 |
| H  | -7.151109 | 3.287353  | -0.381397 |
| Fe | 5.144507  | -0.048466 | 0.048934  |
| P  | 5.382906  | -1.714015 | -1.552371 |
| P  | 5.617672  | -1.768546 | 1.553496  |
| N  | 3.229521  | -0.293455 | 0.056665  |
| N  | 0.191878  | 1.652344  | 1.298224  |
| N  | 0.238479  | 1.638065  | -1.310481 |
| C  | 2.036382  | -0.239571 | 0.037135  |
| C  | -0.026655 | 2.875436  | 0.717787  |
| C  | 0.002133  | 2.867698  | -0.751067 |
| C  | 5.203502  | 1.90025   | -0.862785 |
| C  | 0.557435  | 1.571462  | -2.625691 |
| H  | 0.844585  | 0.597504  | -3.004975 |

|   |           |           |           |
|---|-----------|-----------|-----------|
| C | 8.408227  | 0.292786  | 0.326616  |
| H | 8.59264   | -0.504277 | -0.404286 |
| H | 9.200186  | 1.039615  | 0.187033  |
| H | 8.543677  | -0.126933 | 1.32845   |
| C | 0.470513  | 1.600766  | 2.622997  |
| H | 0.747487  | 0.631657  | 3.021495  |
| C | 7.064031  | 0.918522  | 0.148166  |
| C | 5.036839  | 2.011445  | 0.569918  |
| C | 6.473857  | 1.274672  | -1.121507 |
| C | -0.041009 | 4.02613   | -1.538882 |
| H | -0.244224 | 4.991103  | -1.088296 |
| C | 6.18675   | 1.416487  | 1.202049  |
| C | 3.896357  | 2.660993  | 1.276042  |
| H | 3.760472  | 2.245786  | 2.280674  |
| H | 4.080363  | 3.737148  | 1.385671  |
| H | 2.955723  | 2.532094  | 0.72509   |
| C | 4.245684  | 2.379504  | -1.899015 |
| H | 3.222311  | 2.417779  | -1.506838 |
| H | 4.514186  | 3.388139  | -2.237936 |
| H | 4.247229  | 1.728678  | -2.78208  |
| C | 0.550254  | 2.692692  | -3.458218 |
| H | 0.804873  | 2.589269  | -4.506265 |
| C | -0.099027 | 4.04226   | 1.491034  |
| H | -0.289203 | 5.001892  | 1.023622  |
| C | 0.437306  | 2.731488  | 3.441977  |
| H | 0.662306  | 2.640933  | 4.49799   |
| C | 0.211706  | 3.939055  | -2.91208  |
| H | 0.178131  | 4.825789  | -3.534903 |
| C | 6.48524   | 1.444886  | 2.664802  |
| H | 7.259203  | 0.725582  | 2.949564  |
| H | 6.862721  | 2.436261  | 2.945251  |
| H | 5.595398  | 1.25556   | 3.275826  |
| C | 0.111834  | 3.970745  | 2.872245  |
| H | 0.058221  | 4.86431   | 3.483824  |
| C | 7.111086  | 1.111502  | -2.459871 |
| H | 6.381376  | 0.934737  | -3.258414 |
| H | 7.642681  | 2.036638  | -2.718697 |
| H | 7.85774   | 0.311337  | -2.477642 |
| C | 5.247204  | -3.391534 | -0.68384  |
| H | 5.59156   | -4.190446 | -1.346256 |
| H | 4.185187  | -3.558502 | -0.465902 |
| C | 6.079666  | -3.339183 | 0.600561  |
| H | 5.915566  | -4.223353 | 1.222324  |
| H | 7.152624  | -3.2863   | 0.379814  |

|   |           |           |           |
|---|-----------|-----------|-----------|
| H | 6.602368  | -1.653478 | 2.582586  |
| H | 4.460956  | -2.143696 | 2.307499  |
| H | 4.40895   | -1.752826 | -2.599051 |
| H | 6.60284   | -1.813343 | -2.29458  |
| H | -6.603595 | 1.814809  | 2.293061  |
| H | -4.409931 | 1.753174  | 2.599096  |
| H | -4.460049 | 2.142787  | -2.308678 |
| H | -6.601754 | 1.653379  | -2.583098 |

**Optimized Cartesian Coordinates of 2<sup>3+</sup>**

| Atomic Name | X         | Y         | Z         |
|-------------|-----------|-----------|-----------|
| Ru          | -0.087127 | 0.043562  | 0.077826  |
| Fe          | 5.064563  | -0.077242 | -0.084296 |
| Fe          | -5.164436 | 0.021152  | -0.033041 |
| P           | 5.069569  | -2.111989 | 0.899345  |
| P           | 5.029641  | -1.192059 | -2.047383 |
| P           | -5.190615 | 1.364098  | -1.913733 |
| P           | -5.335208 | 2.012361  | 1.125937  |
| N           | -3.293949 | 0.141413  | 0.064054  |
| N           | 3.166314  | -0.090271 | -0.051286 |
| N           | -0.247137 | 1.741457  | -1.16968  |
| N           | 0.095359  | -1.606439 | -1.238065 |
| N           | 0.300504  | 1.646945  | 1.395018  |
| C           | -2.093901 | 0.114545  | 0.099796  |
| N           | -0.281748 | -1.613879 | 1.360253  |
| C           | 0.138514  | -2.840508 | -0.645257 |
| C           | 1.978983  | -0.047126 | 0.000351  |
| C           | 1.196358  | 2.570541  | 3.435776  |
| H           | 1.557367  | 2.390901  | 4.443565  |
| C           | 0.78456   | -3.912363 | -2.737307 |
| C           | 0.33381   | 2.897673  | 0.842024  |
| C           | 0.469926  | -3.990571 | -1.372147 |
| H           | 0.504662  | -4.955281 | -0.875    |
| C           | 0.754057  | 4.012857  | 1.577404  |
| H           | 0.780816  | 4.993413  | 1.112069  |
| C           | -5.171329 | 3.195405  | -1.402934 |
| H           | -4.60292  | 3.778978  | -2.133225 |
| H           | -6.207267 | 3.552213  | -1.42605  |
| C           | 1.187888  | 3.875475  | 2.90411   |
| C           | -0.055241 | 2.957815  | -0.569884 |
| C           | 0.764535  | 1.498488  | 2.660814  |
| H           | 0.827121  | 0.485712  | 3.040229  |
| C           | -4.572409 | 3.330921  | 0.001348  |
| H           | -4.744052 | 4.33097   | 0.409002  |

|   |           |           |           |
|---|-----------|-----------|-----------|
| H | -3.492595 | 3.1373    | -0.0063   |
| C | -0.25229  | 4.155613  | -1.269016 |
| H | -0.082583 | 5.107347  | -0.774714 |
| C | -0.716369 | 1.726683  | -2.441716 |
| H | -0.940316 | 0.752472  | -2.86281  |
| C | -0.365665 | -4.020931 | 1.533109  |
| H | -0.264612 | -4.992013 | 1.057893  |
| C | -0.712061 | -3.957713 | 2.891553  |
| C | -0.895987 | -2.672459 | 3.439872  |
| H | -1.201772 | -2.556049 | 4.474829  |
| C | -5.85684  | -1.764077 | -0.912836 |
| C | -7.030708 | -0.998593 | -0.522898 |
| C | 0.783747  | -2.62707  | -3.314723 |
| H | 1.055306  | -2.492649 | -4.356954 |
| C | -0.6824   | -1.543055 | 2.654349  |
| H | -0.858442 | -0.550244 | 3.052979  |
| C | 0.45085   | -1.516853 | -2.54331  |
| H | 0.507665  | -0.520194 | -2.964198 |
| C | -5.105304 | -2.058159 | 0.285446  |
| C | -0.163748 | -2.85097  | 0.789583  |
| C | -3.870142 | -2.88958  | 0.348842  |
| H | -3.25242  | -2.754045 | -0.54645  |
| H | -4.135854 | -3.952007 | 0.418167  |
| H | -3.258599 | -2.638946 | 1.223213  |
| C | 5.526771  | 1.310154  | 1.410803  |
| C | 6.988624  | 0.778765  | -0.333257 |
| C | 4.695509  | -3.038769 | -1.700357 |
| H | 3.608965  | -3.140362 | -1.560281 |
| H | 4.994977  | -3.655763 | -2.552756 |
| C | -6.981854 | -0.802215 | 0.897195  |
| C | 8.17995   | 0.252313  | -1.070724 |
| H | 8.396188  | -0.790809 | -0.804317 |
| H | 9.075529  | 0.838983  | -0.830597 |
| H | 8.050896  | 0.301198  | -2.157713 |
| C | -0.934477 | 2.886228  | -3.181736 |
| H | -1.289464 | 2.811775  | -4.205003 |
| C | -5.311483 | -1.455336 | 2.8192    |
| H | -4.219772 | -1.36834  | 2.885812  |
| H | -5.59942  | -2.398578 | 3.299661  |
| H | -5.749401 | -0.644995 | 3.411736  |
| C | 3.896876  | 2.906991  | 0.143121  |
| H | 3.444253  | 2.890726  | -0.856444 |
| H | 4.178485  | 3.943357  | 0.371984  |
| H | 3.1284    | 2.597188  | 0.863322  |

|   |           |           |           |
|---|-----------|-----------|-----------|
| C | -5.769136 | -1.419153 | 1.399166  |
| C | 6.735384  | 0.592412  | 1.064897  |
| C | 5.084477  | 2.007128  | 0.222911  |
| C | 5.443322  | -3.433695 | -0.423375 |
| H | 6.528302  | -3.430526 | -0.587328 |
| H | 5.157859  | -4.430463 | -0.07486  |
| C | 5.961908  | 1.668659  | -0.858567 |
| C | -8.152272 | -0.564382 | -1.407644 |
| H | -8.504075 | 0.444637  | -1.160745 |
| H | -9.008875 | -1.239094 | -1.285749 |
| H | -7.879857 | -0.584765 | -2.467445 |
| C | 5.893472  | 2.213393  | -2.250725 |
| H | 6.342599  | 1.531297  | -2.982826 |
| H | 6.438492  | 3.162662  | -2.324624 |
| H | 4.858881  | 2.402192  | -2.561882 |
| C | -0.67414  | 4.146739  | -2.607    |
| C | -8.042168 | -0.135202 | 1.707475  |
| H | -7.671369 | 0.225101  | 2.672823  |
| H | -8.84398  | -0.852913 | 1.923263  |
| H | -8.505417 | 0.703339  | 1.175194  |
| C | -0.833594 | 5.415674  | -3.390345 |
| H | -1.082586 | 6.265164  | -2.747778 |
| H | -1.604402 | 5.324375  | -4.161289 |
| H | 0.103289  | 5.664206  | -3.903687 |
| C | 4.907169  | 1.407922  | 2.767846  |
| H | 3.811769  | 1.460371  | 2.69837   |
| H | 5.252856  | 2.300288  | 3.307053  |
| H | 5.156578  | 0.536562  | 3.385275  |
| C | 1.679586  | 5.043443  | 3.704592  |
| H | 1.257418  | 5.040661  | 4.714564  |
| H | 1.432735  | 5.99766   | 3.232365  |
| H | 2.770211  | 4.998892  | 3.815237  |
| C | 1.127443  | -5.129297 | -3.543384 |
| H | 1.403402  | -5.976011 | -2.909162 |
| H | 1.954036  | -4.931095 | -4.233269 |
| H | 0.271648  | -5.441195 | -4.154049 |
| C | -5.519617 | -2.260255 | -2.280237 |
| H | -6.07203  | -1.729326 | -3.062582 |
| H | -5.770135 | -3.323795 | -2.377897 |
| H | -4.447213 | -2.156681 | -2.48717  |
| C | -0.88117  | -5.195124 | 3.721127  |
| H | -1.135789 | -6.065862 | 3.110513  |
| H | -1.655522 | -5.068697 | 4.483479  |
| H | 0.051343  | -5.42933  | 4.248944  |



|   |           |           |           |
|---|-----------|-----------|-----------|
| C | 7.626792  | -0.1572   | 2.001948  |
| H | 7.098078  | -0.517311 | 2.892116  |
| H | 8.432812  | 0.49937   | 2.352749  |
| H | 8.106789  | -1.015624 | 1.515523  |
| H | 3.802436  | -2.587956 | 1.400481  |
| H | 5.924692  | -2.501014 | 1.984103  |
| H | 4.029099  | -0.896405 | -3.040838 |
| H | 6.187106  | -1.251886 | -2.897985 |
| H | -6.602208 | 2.565032  | 1.502244  |
| H | -4.605485 | 2.11469   | 2.351435  |
| H | -6.208131 | 1.296879  | -2.918568 |
| H | -4.009672 | 1.204099  | -2.707453 |

**Optimized Cartesian Coordinates of 2<sup>4+</sup>**

| Atomic Name | X         | Y         | Z         |
|-------------|-----------|-----------|-----------|
| Ru          | -0.014652 | 0.028268  | -0.034189 |
| Fe          | 5.136644  | 0.00963   | -0.01635  |
| Fe          | -5.169827 | -0.034596 | -0.028545 |
| P           | 5.355026  | -0.913748 | -2.139676 |
| P           | 5.18741   | -2.206576 | 0.700278  |
| P           | -5.285983 | 2.051967  | 1.001409  |
| P           | -5.406208 | 1.182644  | -1.995366 |
| N           | 0.208917  | 1.699655  | 1.246592  |
| N           | -0.206201 | 1.681373  | -1.349032 |
| N           | 3.22172   | -0.050492 | -0.048136 |
| N           | 0.216612  | -1.661501 | -1.300542 |
| N           | -3.255568 | 0.0824    | -0.050481 |
| N           | -0.238507 | -1.60847  | 1.288797  |
| C           | 2.027185  | -0.009586 | -0.033268 |
| C           | -2.060259 | 0.059446  | -0.043902 |
| C           | 0.211072  | -2.885341 | -0.683342 |
| C           | -0.348355 | -4.012484 | 1.508846  |
| H           | -0.251271 | -4.994311 | 1.055565  |
| C           | 0.518778  | -4.059141 | -1.382442 |
| H           | 0.504587  | -5.016125 | -0.869453 |
| C           | -0.590267 | 1.599794  | -2.647227 |
| H           | -0.736405 | 0.604256  | -3.049271 |
| C           | 5.202647  | 2.027441  | 0.602602  |
| C           | 0.908148  | -2.747194 | -3.346222 |
| H           | 1.1877    | -2.64339  | -4.389884 |
| C           | 0.850996  | -4.021275 | -2.747039 |
| C           | 0.583736  | 1.631355  | 2.549037  |
| H           | 0.706612  | 0.639426  | 2.968197  |
| C           | 0.412475  | 4.103625  | 1.387976  |

|   |           |           |           |
|---|-----------|-----------|-----------|
| H | 0.371438  | 5.071682  | 0.898155  |
| C | -0.364314 | 4.086362  | -1.529732 |
| H | -0.294564 | 5.061741  | -1.057838 |
| C | -0.135361 | 2.925378  | -0.779987 |
| C | -0.726859 | -3.920945 | 2.858751  |
| C | -0.830119 | 2.720084  | -3.439223 |
| H | -1.117474 | 2.591043  | -4.477948 |
| C | 0.600767  | -1.611342 | -2.600272 |
| H | 0.691991  | -0.627098 | -3.043671 |
| C | 4.745707  | -3.284619 | -0.792393 |
| H | 4.9562    | -4.335956 | -0.576978 |
| H | 3.666277  | -3.173716 | -0.961492 |
| C | -0.69282  | 4.012035  | -2.893547 |
| C | 0.163484  | 2.934914  | 0.656959  |
| C | -7.131885 | -0.97899  | -0.181113 |
| C | 5.548339  | 1.187296  | 1.727633  |
| C | 5.554065  | -2.794111 | -1.997422 |
| H | 5.233787  | -3.281176 | -2.922716 |
| H | 6.623268  | -3.00202  | -1.869495 |
| C | 7.141981  | 0.832519  | 0.055039  |
| C | -0.12003  | -2.859765 | 0.746206  |
| C | 6.176652  | 1.80282   | -0.441967 |
| C | -6.068634 | -1.820411 | -0.708293 |
| C | -5.152292 | -2.100384 | 0.376049  |
| C | -0.670532 | -1.51084  | 2.571252  |
| H | -0.852271 | -0.510606 | 2.947586  |
| C | -5.576671 | 3.028859  | -1.591827 |
| H | -5.218859 | 3.633826  | -2.429472 |
| H | -6.646072 | 3.238397  | -1.4695   |
| C | -0.911867 | -2.622358 | 3.374936  |
| H | -1.243987 | -2.481622 | 4.398762  |
| C | 0.73503   | 4.045769  | 2.753772  |
| C | -4.80098  | 3.332458  | -0.306376 |
| H | -5.01526  | 4.342623  | 0.053635  |
| H | -3.71808  | 3.24087   | -0.460043 |
| C | 6.775832  | 0.497481  | 1.407088  |
| C | 0.839825  | 2.760386  | 3.323177  |
| H | 1.122417  | 2.643547  | 4.364736  |
| C | -6.870468 | -0.754863 | 1.215719  |
| C | 4.058668  | 2.979008  | 0.530202  |
| H | 4.380996  | 3.981395  | 0.839009  |
| H | 3.238032  | 2.670933  | 1.188927  |
| H | 3.663262  | 3.055453  | -0.48944  |
| C | -3.950611 | -2.977804 | 0.304296  |

|   |           |           |           |
|---|-----------|-----------|-----------|
| H | -3.514085 | -2.984654 | -0.700666 |
| H | -4.222745 | -4.009957 | 0.55814   |
| H | -3.178055 | -2.648683 | 1.009838  |
| C | -5.620397 | -1.399772 | 1.550916  |
| C | -8.355472 | -0.518586 | -0.902498 |
| H | -8.606284 | 0.523268  | -0.665911 |
| H | -9.2193   | -1.126172 | -0.603922 |
| H | -8.265107 | -0.612287 | -1.988909 |
| C | 8.374075  | 0.353716  | -0.639767 |
| H | 8.542975  | -0.719647 | -0.482963 |
| H | 9.258204  | 0.8734    | -0.24948  |
| H | 8.345859  | 0.542811  | -1.71727  |
| C | -5.997091 | -2.410205 | -2.077935 |
| H | -6.552297 | -1.82295  | -2.816301 |
| H | -6.436408 | -3.415622 | -2.080398 |
| H | -4.9628   | -2.507504 | -2.426479 |
| C | -0.887375 | 5.241809  | -3.727699 |
| H | -1.174189 | 6.107712  | -3.124728 |
| H | -1.644387 | 5.092109  | -4.503085 |
| H | 0.04493   | 5.50295   | -4.243404 |
| C | 4.815656  | 1.097945  | 3.022422  |
| H | 3.744049  | 1.286775  | 2.890715  |
| H | 5.198675  | 1.838205  | 3.736292  |
| H | 4.931712  | 0.112737  | 3.4883    |
| C | 6.243845  | 2.544577  | -1.735828 |
| H | 6.81474   | 2.008356  | -2.500687 |
| H | 6.744056  | 3.510303  | -1.590173 |
| H | 5.246629  | 2.755058  | -2.138625 |
| C | 1.130708  | -5.271673 | -3.52469  |
| H | 1.548906  | -6.061982 | -2.89454  |
| H | 1.816188  | -5.089948 | -4.357361 |
| H | 0.203277  | -5.665942 | -3.958029 |
| C | 7.58066   | -0.345015 | 2.336651  |
| H | 6.968666  | -0.873834 | 3.07609   |
| H | 8.263287  | 0.302489  | 2.90309   |
| H | 8.208784  | -1.070409 | 1.809222  |
| C | -4.977158 | -1.414834 | 2.895956  |
| H | -3.884451 | -1.459829 | 2.816727  |
| H | -5.303975 | -2.290041 | 3.471755  |
| H | -5.23853  | -0.528508 | 3.484451  |
| C | -0.934286 | -5.139764 | 3.70535   |
| H | -1.723617 | -4.988817 | 4.447357  |
| H | -0.01936  | -5.379463 | 4.261084  |
| H | -1.187352 | -6.018285 | 3.105642  |

|   |           |           |           |
|---|-----------|-----------|-----------|
| C | -7.784291 | -0.052532 | 2.160665  |
| H | -7.259575 | 0.398522  | 3.010093  |
| H | -8.491894 | -0.779677 | 2.581108  |
| H | -8.387683 | 0.71683   | 1.667431  |
| C | 0.965372  | 5.284016  | 3.56557   |
| H | 1.752461  | 5.138347  | 4.311305  |
| H | 0.056116  | 5.555657  | 4.11579   |
| H | 1.234707  | 6.140619  | 2.942     |
| H | 6.390065  | -2.800125 | 1.202428  |
| H | 4.244472  | -2.568706 | 1.712753  |
| H | 6.370544  | -0.512415 | -3.062481 |
| H | 4.172983  | -0.750404 | -2.930531 |
| H | -4.245046 | 1.105821  | -2.827841 |
| H | -6.446299 | 0.928545  | -2.94258  |
| H | -4.391662 | 2.277133  | 2.094081  |
| H | -6.518389 | 2.557727  | 1.526447  |
